# Supplementary material for: Non-Steroidal Drug Interferences in a Quantitative Multisteroid LC-MS/MS Assay
Source: MDPI journal article supplement (doi:10.3390/cells12020329), 2023-01-15
Supplement: s1 [file s1]

# Supplement

## Non-steroidal Drug Interferences in a Quantitative Multiteroid LC-MS/MS Assay

Valentin Braun <sup>1,2</sup>, Hermann Stuppner <sup>1</sup>, and Christoph Seger <sup>1,2,\*</sup>

<sup>1</sup> Institute of Pharmacy/Pharmacognosy, CCB—Centrum of Chemistry and Biomedicine, University of Innsbruck, Innrain 80-82, A-6020 Innsbruck, Austria

<sup>2</sup> Risch Ostschweiz AG, Lagerstrasse 30, 9470 Buchs, Switzerland

\* Correspondence: christoph.seger@uibk.ac.at

Description of supporting material:

**Scheme S1:** Steroid analytes and the respective interferences presented in this work. Chemical structures, sum formula, molecular weight and CAS number is depicted together with the substance name and the abbreviation used in parenthesis.

**Figure S1:** Product ion spectra from precursor ion  $m/z$  331 at CE 31V recorded by infusing a pure solution of PX.

**Figure S2:** Influence of column LOT and injection matrix on RT of PX in comparison to 17P. (A) Overlay of ion transition chromatograms of PX, PX-IS, 17P and 17P-IS from injecting single-compound solutions in 50% methanol on three different columns (#6, #7, #8). (B) Overlay of PX and 17P ion transition chromatograms from injecting a PBS solution of each compound that was processed by general sample preparation on the same three columns.

**Figure S3:** Isotope pattern as calculated with the online tool "mstool" and chemical structure of alpha-hydroxytriazolam

**Table S1:** TDM panels used for interference checks.

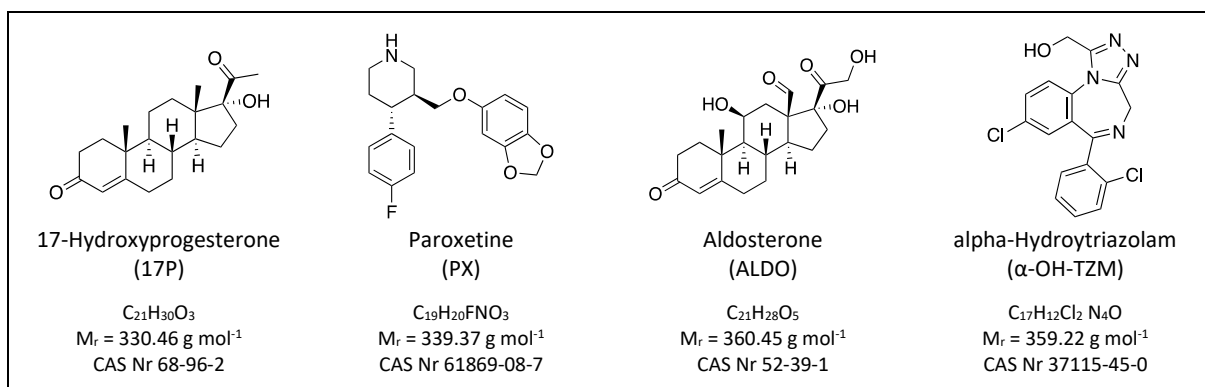

**Scheme S1:** Steroid analytes and the respective interferences presented in this work. Chemical structures, sum formula, molecular weight and CAS number is depicted together with the substance name and the abbreviation used in parenthesis.

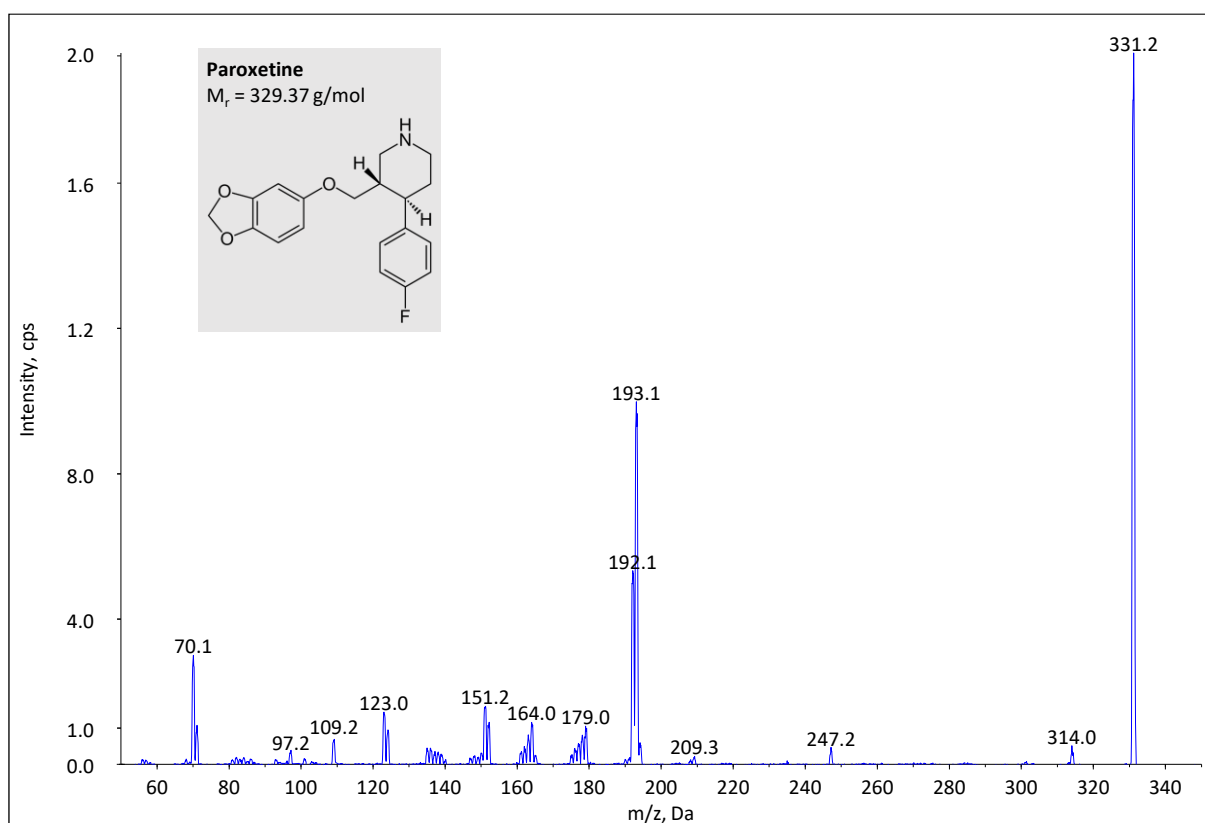

**Figure S1:** Product ion spectra from precursor ion  $m/z$  331 at CE 31V recorded by infusing a pure solution of PX.

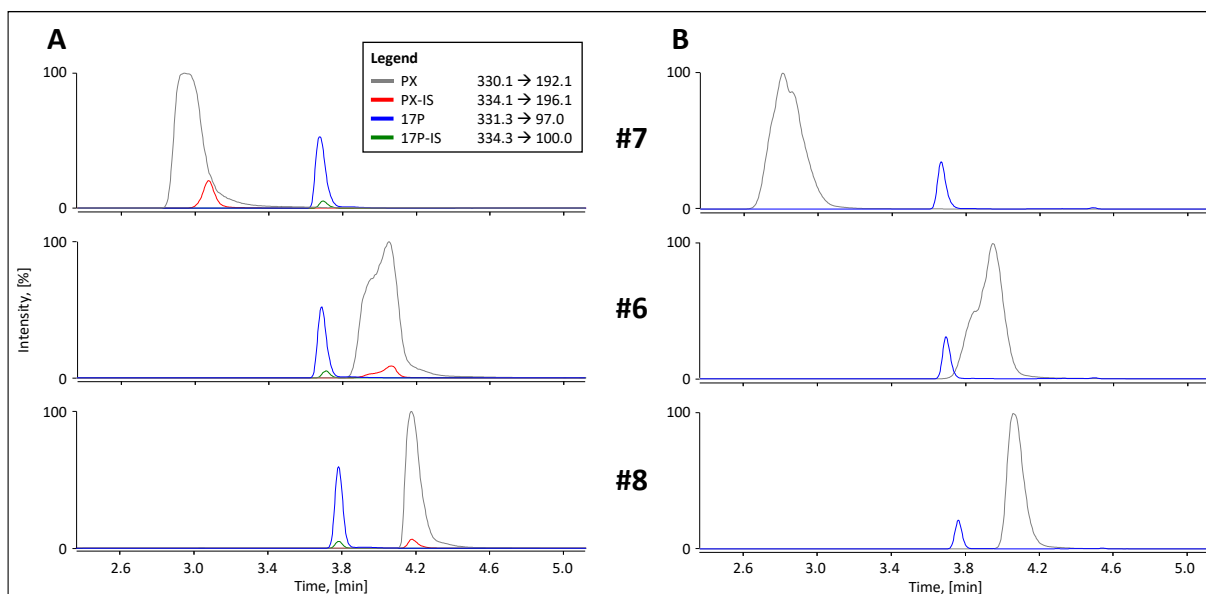

**Figure S2:** Influence of column LOT and injection matrix on RT of PX in comparison to 17P. (A) Overlay of ion transition chromatograms of PX, PX-IS, 17P and 17P-IS from injecting single-compound solutions in 50% methanol on three different columns (#6, #7, #8). (B) Overlay of PX and 17P ion transition chromatograms from injecting a PBS solution of each compound that was processed by general sample preparation on the same three columns.

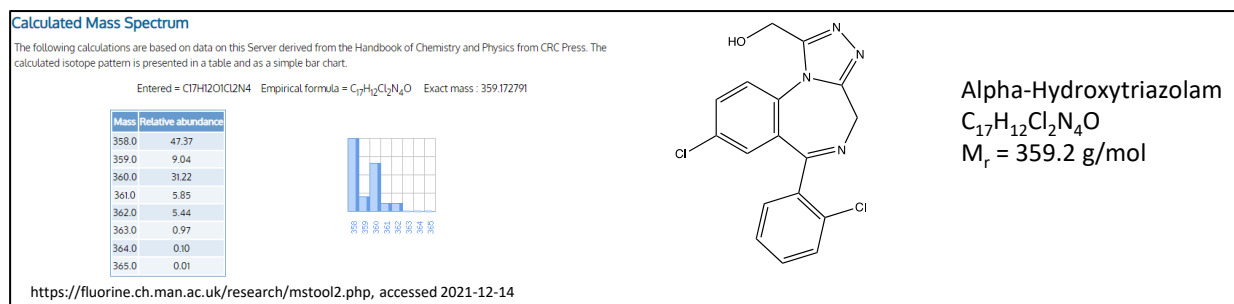

**Figure S3:** Isotope pattern as calculated with the online tool "mstool" and chemical structure of alpha-hydroxytriazolam

**Table S1:** Commerical TDM panels used for interference checks.

| TDM panel name                                         | Included Drugs and their molecular masses (g/mol) |       |                         |       |
|--------------------------------------------------------|---------------------------------------------------|-------|-------------------------|-------|
| “Benzodiazepines<br>panel 1” <sup>1</sup>              | Chlordiazepoxide                                  | 299.8 | Midazolam               | 325.8 |
|                                                        | Clobazam                                          | 300.7 | 1-OH-Midazolam          | 341.8 |
|                                                        | Norclobazam                                       | 286.7 | Oxazepam                | 286.7 |
|                                                        | Demoxepam                                         | 286.7 | Prazepam                | 324.8 |
|                                                        | Diazepam                                          | 284.7 | Temazepam               | 300.7 |
|                                                        | Nordiazepam                                       | 270.7 | Tetrazepam              | 288.8 |
|                                                        | Medazepam                                         | 270.8 |                         |       |
| “Benzodiazepines<br>Panel 2” <sup>1</sup>              | Alprazolam                                        | 308.8 | Desalkylflurazepam      | 288.7 |
|                                                        | Bromazepam                                        | 316.2 | Lorazepam               | 321.2 |
|                                                        | Clonazepam                                        | 315.7 | Lormetazepam            | 335.2 |
|                                                        | Flunitrazepam                                     | 313.3 | Nitrazepam              | 281.3 |
|                                                        | Flurazepam                                        | 387.9 | Triazolam               | 343.2 |
| “Neuroleptics<br>Panel 1” <sup>1</sup>                 | Aripiprazol                                       | 448.4 | Olanzapine              | 312.4 |
|                                                        | Dehydroaripiprazol                                | 446.4 | Quetiapine              | 383.5 |
|                                                        | Clozapine                                         | 326.8 | Norquetiapine           | 295.4 |
|                                                        | N-Desmethyleclozapine                             | 312.8 | Risperidone             | 410.5 |
|                                                        | Haloperidol                                       | 375.9 | 9-OH-Risperidone        | 426.5 |
|                                                        | N-Desmethyllanzapine                              | 298.4 |                         |       |
| “Neuroleptics<br>Panel 2” <sup>1</sup>                 | Amisulpride                                       | 369.5 | Melperone               | 263.4 |
|                                                        | Benperidol                                        | 381.4 | Perazine                | 339.5 |
|                                                        | Brexipiprazole                                    | 433.6 | Perphenazine            | 404.0 |
|                                                        | Bromperidol                                       | 420.3 | Pimozide                | 461.6 |
|                                                        | Cariprazine                                       | 427.4 | Pipamperone             | 375.5 |
|                                                        | Chlorpromazine                                    | 318.9 | Promethazine            | 274.4 |
|                                                        | Chlorprothixene                                   | 315.9 | Prothipendyl            | 285.4 |
|                                                        | Flupentixol                                       | 434.5 | Sertindole              | 440.9 |
|                                                        | Fluphenazine                                      | 437.5 | Sulforidazine           | 402.6 |
|                                                        | Guanfacine                                        | 246.1 | Sulpiride               | 341.4 |
|                                                        | Ilperidone                                        | 426.5 | Thioridazine            | 370.6 |
|                                                        | Levomepromazine                                   | 328.5 | Ziprasidone             | 412.9 |
|                                                        | Loxapine                                          | 327.8 | Zotepine                | 331.9 |
|                                                        | Lurasidone                                        | 492.7 | Zuclopenthixol          | 401.0 |
| “Tricyclic<br>Antidepressants<br>Panel 1” <sup>1</sup> | Amitryptiline                                     | 277.4 | Desipramine             | 266.4 |
|                                                        | Doxepin                                           | 279.4 | Nortriptyline           | 263.4 |
|                                                        | Nordoxepin                                        | 265.4 | Imipramine              | 280.4 |
| “Tricyclic<br>Antidepressants<br>Panel 2” <sup>1</sup> | Clomipramine                                      | 314.9 | Protriptyline           | 263.4 |
|                                                        | Norclomipramine                                   | 300.8 | Trimipramine            | 294.4 |
|                                                        | Maprotiline                                       | 277.4 | Nortrimipramine         | 280.4 |
|                                                        | Normaprotiline                                    | 263.4 |                         |       |
| “Antidepressants<br>Panel 1” <sup>1</sup>              | Citalopram                                        | 324.4 | N-Desmethylnortazapine  | 251.3 |
|                                                        | N-Desmethyleitalopram                             | 310.4 | Paroxetine              | 329.4 |
|                                                        | Duloxetine                                        | 297.4 | Sertraline              | 306.2 |
|                                                        | Fluoxetine                                        | 309.3 | N-Desmethylesertraline  | 292.2 |
|                                                        | Desmethylefluoxetine                              | 295.3 | Venlafaxine             | 277.4 |
|                                                        | Fluvoxamine                                       | 318.3 | O-Desmethylevenlafaxine | 263.4 |
|                                                        | Mirtazapine                                       | 265.4 |                         |       |
| “Antidepressants<br>Panel 2” <sup>1</sup>              | Atomoxetine                                       | 255.4 | Milnacipran             | 246.4 |
|                                                        | Bupropion                                         | 239.7 | Moclobemide             | 268.7 |
|                                                        | Erythro-Dihydrobupropion                          | 241.8 | Opi Pramol              | 363.5 |
|                                                        | Hydroxybupropion                                  | 255.7 | Reboxetine              | 313.4 |
|                                                        | Threo-Dihydrobupropion                            | 241.8 | Ritalinic Acid          | 219.3 |

| TDM panel name                         | Included Drugs and their molecular masses (g/mol) |       |                       |       |
|----------------------------------------|---------------------------------------------------|-------|-----------------------|-------|
| “Antiepileptic<br>Drugs” <sup>1</sup>  | Clomethiazole                                     | 161.7 | Tianeptine            | 437.0 |
|                                        | Dosulepin                                         | 295.5 | Tranlycypromine       | 133.2 |
|                                        | N-Desmethyldosulepin                              | 281.4 | Trazodone             | 371.9 |
|                                        | Methylphenidate                                   | 233.3 | Vilazodone            | 441.5 |
|                                        | Mianserin                                         | 264.4 | Vortioxetine          | 298.5 |
|                                        | Brivaracetam                                      | 212.3 | Phenylethylmalonamide | 206.2 |
|                                        | Carbamazepine                                     | 236.3 | Phenytoin             | 252.3 |
|                                        | Carbamazepine-10,11-epoxide                       | 252.3 | Pregabalin            | 159.2 |
|                                        | 10,11-Dihydroxycarbamazepine                      | 270.3 | Primidone             | 218.3 |
|                                        | 10-OH-Carbamazepine                               | 252.3 | Retigabine            | 303.3 |
|                                        | Oxcarbamazepine                                   | 252.3 | Rufinamide            | 238.2 |
|                                        | Ethosuximide                                      | 141.2 | Stiripentol           | 234.3 |
|                                        | Felbamate                                         | 238.2 | Sultiame              | 290.4 |
|                                        | Gabapentin                                        | 171.2 | Theophylline          | 180.2 |
|                                        | Lacosamide                                        | 250.3 | Tiagabine             | 375.6 |
|                                        | Lamotrigine                                       | 256.1 | Topiramate            | 339.4 |
|                                        | Levetiracetam                                     | 170.2 | Valproic acid         | 144.2 |
|                                        | N-Desmethylnesuximide                             | 189.2 | Vigabatrin            | 129.2 |
|                                        | Perampanel                                        | 349.4 | Zonisamide            | 212.2 |
| “Antiarrhythmic<br>Drugs” <sup>1</sup> | Phenobarbital                                     | 232.2 |                       |       |
|                                        | Acebutolol                                        | 336.4 | Gallopamil            | 484.6 |
|                                        | Ajmaline                                          | 326.4 | Lidocaine             | 234.3 |
|                                        | Amiodarone                                        | 645.3 | Metoprolol            | 267.4 |
|                                        | Desethylamiodarone                                | 617.3 | Mexiletine            | 179.3 |
|                                        | Aprindine                                         | 322.5 | Propafenone           | 341.4 |
|                                        | Atenolol                                          | 266.3 | Propranolol           | 259.3 |
|                                        | Bisoprolol                                        | 325.5 | Quinidine             | 324.4 |
|                                        | Diltiazem                                         | 414.5 | Hydroquinidine        | 326.4 |
|                                        | Disopyramide                                      | 339.5 | Sotalol               | 272.4 |
|                                        | Dronedarone                                       | 556.8 | Tocainide             | 192.3 |
|                                        | Debutyl-dronedarone                               | 500.7 | Verapamil             | 454.6 |
|                                        | Flecainide                                        | 414.3 | Norverapamil          | 440.6 |
|                                        | Flunarizine                                       | 404.5 |                       |       |
|                                        | Ritalinic acid                                    | 219.3 | Reboxetine            | 313.4 |
|                                        | O-Desmethyltramadol                               | 249.4 | Citalopram            | 324.4 |
|                                        | O-Desmethylvenlafaxine                            | 263.4 | Opipramol             | 363.5 |
|                                        | Moclobemide                                       | 268.7 | Desmethylmianserin    | 250.3 |
|                                        | Guanfacine                                        | 246.1 | Bupropion             | 239.7 |
| “Antidepressant<br>drugs” <sup>2</sup> | Tramadol                                          | 263.4 | Paroxetine            | 329.4 |
|                                        | Hydroxybupropion                                  | 255.7 | Atomoxetine           | 255.4 |
|                                        | Clomethiazole                                     | 161.7 | Fluoxetine            | 318.3 |
|                                        | Methylphenidate                                   | 233.3 | Duloxetine            | 297.4 |
|                                        | Tianeptine                                        | 437.0 | Desmethylfluoxetine   | 295.3 |
|                                        | Milnacipran                                       | 246.4 | Dosulepin             | 295.5 |
|                                        | Desmethylmirtazapine                              | 251.3 | Fluoxetine            | 309.3 |
|                                        | Agomelatine                                       | 243.3 | Desmethylsertraline   | 292.2 |
|                                        | Venlafaxine                                       | 277.4 | Mianserin             | 264.4 |
|                                        | Dihydro-Bupropion                                 | 241.5 | Nefazodone            | 470.0 |
|                                        | Desmethylcitalopram                               | 310.4 | Sertraline            | 306.2 |
|                                        | Trazodone                                         | 371.9 | Vortioxetine          | 298.5 |
|                                        | 7-Aminonitrazepam                                 | 251.3 | Chlordiazepoxide      | 299.8 |
|                                        | 7-Aminoclonazepam                                 | 285.7 | Alprazolam            | 308.8 |
|                                        | 3-Hydroxybromazepam                               | 332.2 | alpha-OH-Midazolam    | 341.8 |

| TDM panel name | Included Drugs and their molecular masses (g/mol) |       |                    |       |
|----------------|---------------------------------------------------|-------|--------------------|-------|
|                | 7-Aminoflunitrazepam                              | 283.3 | Triazolam          | 343.2 |
|                | Bromazepam                                        | 316.2 | Desalkylflurazepam | 288.7 |
|                | Demoxepam                                         | 286.7 | Flunitrazepam      | 313.3 |
|                | Zopiclone                                         | 388.7 | Temazepam          | 300.7 |
|                | Zaleplon                                          | 305.3 | Brotizolam         | 393.7 |
|                | Alpha-OH-Triazolam                                | 359.2 | Nordiazepam        | 270.7 |
|                | Alpha-OH-Alprazolam                               | 324.8 | Clobazam           | 300.7 |
|                | Desmethyflunitrazepam                             | 299.3 | Lormetazepam       | 335.2 |
|                | Oxazepam                                          | 286.7 | Trazodone          | 371.9 |
|                | Nitrazepam                                        | 281.3 | Flurazepam         | 387.9 |
|                | Estazolam                                         | 294.7 | Midazolam          | 325.8 |
|                | Norclobazam                                       | 286.7 | Diazepam           | 284.7 |
|                | Lorazepam                                         | 321.2 | Tetrazepam         | 288.8 |
|                | Clonazepam                                        | 315.7 | Prazepam           | 324.8 |
|                | Zolpidem                                          | 307.4 | Medazepam          | 270.8 |

<sup>1</sup>TDM Panels from Chromsystems®; <sup>2</sup>TDM Panels from Recipe®
